# Supplementary material for: Associations between Environmental Quality and Mortality in the Contiguous United States, 2000–2005
Source: PubMed Central journal article supplement (PMC5332172; doi:10.1289/ehp119), 2016-10-07
Supplement: EHP119.s001.acco.pdf [file EHP119.s001.acco.pdf]

**Note to readers with disabilities:** *EHP* strives to ensure that all journal content is accessible to all readers. However, some figures and Supplemental Material published in *EHP* articles may not conform to [508 standards](#) due to the complexity of the information being presented. If you need assistance accessing journal content, please contact [ehponline@niehs.nih.gov](mailto:ehponline@niehs.nih.gov). Our staff will work with you to assess and meet your accessibility needs within 3 working days.

## **Supplemental Material**

### **The Associations between Environmental Quality and Mortality in the Contiguous United States, 2000-2005**

Yun Jian, Lynne C. Messer, Jyotsna S. Jagai, Kristen M. Rappazzo, Christine L. Gray, Shannon C. Grabich, and Danelle T. Lobdell

#### **Table of Contents**

**Table S1.** Mean, Standard deviation (SD), and range of EQI indices 2000-2005 for the contiguous U.S.

**Table S2.** States in the condensed climate regions in the contiguous U.S.

**Table S3.** Number of counties in each RUCC-climate region combination in the contiguous U.S. 2000-2005

**Table S4.** Percent difference (and 95%CI) in all-cause mortality rate 2000-2005 per 1 standard deviations increase in EQI domain indices estimated from the models clustered by RUCC and climate regions separately

**Table S5.** Percent difference (and 95%CI) in heart disease mortality rates 2000-2005 per 1 standard deviations increase in EQI domain indices estimated from the models clustered by RUCC and climate regions separately.

**Table S6.** Percent difference (95%CI) in stroke mortality rates for the year 2000-2005 per 1 standard deviations increase in EQI domain indices estimated from the models clustered by RUCC and climate regions separately.

**Table S7.** Percent difference (95%CI) in cancer mortality rates 2000-2005 per 1 standard deviations increase in EQI domain indices estimated from the models clustered by RUCC and climate regions separately.

**Table S8.** Percent difference (and 95%CI) in all-cause and cause-specific mortality rates 2000-2005 per 1 standard deviations increase in the overall EQI estimated from the model clustered by RUCC-climate combination.

**Table S9.** Percent difference (and 95%CI) in all-cause and cause-specific mortality rates per 1 standard deviations increase in EQI domain indices estimated from the model clustered by RUCC-climate combination.

**Table S1. Mean, Standard deviation (SD), and range of EQI 2000-2005 indices for the contiguous U.S.**

| EQI              | Mean | SD   | Min   | Max  |
|------------------|------|------|-------|------|
| Overall EQI      | 0.03 | 0.96 | -4.22 | 2.85 |
| Air              | 0.02 | 0.98 | -3.24 | 2.79 |
| Water            | 0.00 | 1.00 | -1.64 | 1.48 |
| Land             | 0.05 | 0.86 | -5.14 | 2.09 |
| Built            | 0.01 | 0.98 | -6.06 | 3.88 |
| Sociodemographic | 0.01 | 0.99 | -4.81 | 3.98 |

**Table S2. States in the condensed climate regions in the contiguous U.S.**

| Climate regions         | States                                                                                                                                                                       |
|-------------------------|------------------------------------------------------------------------------------------------------------------------------------------------------------------------------|
| Dry                     | New Mexico, Arizona, Nevada                                                                                                                                                  |
| Dry continental         | Montana, Idaho, Wyoming, Utah, Colorado                                                                                                                                      |
| Hot summer continental  | South Dakota, Nebraska, Iowa, Illinois, Indiana, Ohio                                                                                                                        |
| Humid subtropical       | Florida, Louisiana, Texas, Georgia, Alabama, Mississippi, Arkansas, Oklahoma, Kansas, Missouri, Tennessee, South Carolina, North Carolina, Virginia, West Virginia, Kentucky |
| Mediterranean           | California, Oregon, Washington                                                                                                                                               |
| Warm summer continental | North Dakota, Minnesota, Wisconsin, Michigan, Pennsylvania, New York, Connecticut, Rhode Island, Massachusetts, Vermont, New Hampshire, Maine                                |

**Table S3. Number of counties in each RUCC-climate region combination in the contiguous U.S. 2000-2005**

| Number of counties | Dry | Dry continental | Hot summer continental | Humid subtropical | Mediterranean | Warm summer continental |
|--------------------|-----|-----------------|------------------------|-------------------|---------------|-------------------------|
| RUCC 1             | 17  | 44              | 158                    | 623               | 65            | 178                     |
| RUCC 2             | 13  | 15              | 61                     | 144               | 21            | 65                      |
| RUCC 3             | 26  | 84              | 191                    | 571               | 32            | 145                     |
| RUCC 4             | 9   | 72              | 130                    | 327               | 15            | 103                     |

**Table S4. Percent difference (and 95%CI) in all-cause mortality rate 2000-2005 per 1 standard deviations increase in EQI domain indices estimated from the models clustered by RUCC and climate regions separately**

| <b>RUCC</b>             | <b>Air</b>            | <b>Water</b>           | <b>Land</b>            | <b>Built</b>          | <b>Sociodemographic</b> |
|-------------------------|-----------------------|------------------------|------------------------|-----------------------|-------------------------|
| RUCC1                   | 3.89 (3.45,4.33)      | -0.44 (-0.80,-0.08)    | -1.03 (-1.62,-0.44)    | 0.69 (0.35,1.03)      | 0.03 (-0.43,0.49)       |
| RUCC2                   | 3.37 (2.47,4.28)      | -0.57 (-1.07,-0.07)    | 0.26 (-0.72,1.25)      | 1.38 (0.85,1.91)      | -1.45 (-2.41,-0.49)     |
| RUCC3                   | 2.09 (1.56,2.63)      | -0.41 (-0.76,-0.05)    | -1.67 (-2.32,-1.02)    | 1.18 (0.84,1.51)      | -1.08 (-1.63,-0.52)     |
| RUCC4                   | 3.26 (2.74,3.78)      | 0.16 (-0.23,0.54)      | -1.58 (-2.37,-0.79)    | 1.11 (0.75,1.46)      | 0.32 (-0.28,0.93)       |
| <b>Climate</b>          | <b>Air</b>            | <b>Water</b>           | <b>Land</b>            | <b>Built</b>          | <b>Sociodemographic</b> |
| Dry                     | -1.70<br>(-3.49,0.08) | -1.10<br>(-2.30,0.10)  | 13.11<br>(9.56,16.66)  | 3.01<br>(1.45,4.57)   | 1.51<br>(0.72,2.30)     |
| Dry continental         | 4.60<br>(3.53,5.67)   | 0.13<br>(-0.90,1.16)   | 2.74<br>(-0.27,5.75)   | -0.99<br>(-2.10,0.13) | -0.92<br>(-1.37,-0.47)  |
| Hot summer continental  | 4.26<br>(3.42,5.10)   | 1.03<br>(0.28,1.78)    | -1.50<br>(-3.33,0.34)  | 0.74<br>(0.15,1.33)   | -1.36<br>(-1.71,-1.01)  |
| Humid subtropical       | 2.56<br>(1.98,3.14)   | -0.58<br>(-0.97,-0.19) | -0.94<br>(-1.37,-0.51) | 1.41<br>(1.03,1.78)   | -0.31<br>(-0.57,-0.04)  |
| Mediterranean           | 2.79<br>(0.98,4.61)   | 0.57<br>(-0.34,1.48)   | 0.73<br>(-4.79,6.25)   | 2.19<br>(0.93,3.46)   | -0.87<br>(-1.72,-0.03)  |
| Warm summer continental | 4.73<br>(3.81,5.66)   | 0.11<br>(-0.54,0.76)   | -2.71<br>(-3.93,-1.50) | 2.02<br>(1.12,2.92)   | -1.66<br>(-2.06,-1.26)  |

RUCC1 : Metropolitan urbanized, RUCC2: Non-metropolitan urbanized, RUCC3: Less urbanized, RUCC 4: Thinly populate

**Table S5. Percent difference (and 95%CI) in heart disease mortality rates 2000-2005 per 1 standard deviations increase in EQI domain indices estimated from the models clustered by RUCC and climate regions separately.**

| <b>RUCC</b>             | <b>Air</b>          | <b>Water</b>        | <b>Land</b>         | <b>Built</b>        | <b>Sociodemographic</b> |
|-------------------------|---------------------|---------------------|---------------------|---------------------|-------------------------|
| RUCC1                   | 4.91 (4.13,5.69)    | -1.39 (-1.78,-1.00) | -1.16 (-2.06,-0.27) | -1.03 (-1.20,-0.86) | -1.86 (-2.54,-1.19)     |
| RUCC2                   | 7.55 (6.06,9.03)    | -2.66 (-3.34,-1.98) | 0.80 (-0.86,2.47)   | -0.55 (-0.82,-0.27) | -3.90 (-5.03,-2.77)     |
| RUCC3                   | 5.33 (4.41,6.25)    | -2.28 (-2.76,-1.80) | -2.75 (-3.57,-1.94) | -0.55 (-0.75,-0.36) | -3.67 (-4.47,-2.86)     |
| RUCC4                   | 3.47 (2.57,4.36)    | -0.91 (-1.46,-0.37) | -2.84 (-3.63,-2.06) | -1.17 (-1.41,-0.93) | -1.23 (-2.19,-0.26)     |
| <b>Climate</b>          | <b>Air</b>          | <b>Water</b>        | <b>Land</b>         | <b>Built</b>        | <b>Sociodemographic</b> |
| Dry                     | -6.45 (-9.72,-3.18) | 1.06 (-1.16,3.28)   | 10.79 (8.35,13.23)  | 0.35 (-1.26,1.95)   | 4.35 (2.31,6.39)        |
| Dry continental         | 3.93 (1.95,5.92)    | 0.50 (-1.32,2.31)   | 2.90 (0.49,5.31)    | -2.40 (-3.44,-1.37) | -2.42 (-4.05,-0.80)     |
| Hot summer continental  | 4.13 (2.67,5.59)    | -0.42 (-1.69,0.85)  | -0.36 (-1.80,1.09)  | -1.08 (-2.03,-0.14) | -2.93 (-4.04,-1.83)     |
| Humid subtropical       | 2.67 (1.80,3.54)    | -1.43 (-2.08,-0.77) | -0.97 (-1.39,-0.54) | 0.52 (-0.11,1.14)   | -3.22 (-3.77,-2.68)     |
| Mediterranean           | 3.51 (0.52,6.51)    | 1.66 (0.17,3.14)    | 2.67 (0.03,5.31)    | -2.11 (-3.52,-0.70) | -2.72 (-4.90,-0.54)     |
| Warm summer continental | 8.24 (6.77,9.70)    | -2.52 (-3.58,-1.46) | -3.35 (-4.55,-2.15) | -1.85 (-2.80,-0.90) | -5.71 (-6.79,-4.63)     |

**Table S6. Percent difference (95%CI) in cancer mortality rates 2000-20005 per 1 standard deviations increase in EQI domain indices estimated from the models clustered by RUCC and climate regions separately.**

| <b>RUCC</b>             | <b>Air</b>        | <b>Water</b>        | <b>Land</b>         | <b>Built</b>        | <b>Sociodemographic</b> |
|-------------------------|-------------------|---------------------|---------------------|---------------------|-------------------------|
| RUCC1                   | 3.30 (3.10,3.50)  | -0.74 (-1.22,-0.26) | -0.78 (-1.21,-0.35) | 0.04 (-0.29,0.37)   | 0.90 (0.45,1.35)        |
| RUCC2                   | 3.24 (2.96,3.52)  | -0.71 (-1.38,-0.03) | 0.16 (-0.60,0.91)   | 1.28 (0.44,2.13)    | -0.43 (-1.38,0.52)      |
| RUCC3                   | 3.30 (3.15,3.46)  | -0.77 (-1.13,-0.40) | -0.73 (-1.22,-0.24) | 0.37 (-0.15,0.88)   | 0.51 (-0.11,1.12)       |
| RUCC4                   | 2.85 (2.66,3.05)  | 0.32 (-0.14,0.78)   | -0.57 (-1.08,-0.07) | 0.30 (-0.19,0.79)   | 0.09 (-0.55,0.73)       |
| <b>Climate</b>          | <b>Air</b>        | <b>Water</b>        | <b>Land</b>         | <b>Built</b>        | <b>Sociodemographic</b> |
| Dry                     | 0.56 (-0.03,1.15) | -1.73 (-3.02,-0.45) | 11.07 (7.94,14.20)  | 0.00 (-2.01,2.02)   | 2.85 (1.88,3.81)        |
| Dry continental         | 2.79 (2.18,3.41)  | 0.49 (-0.54,1.51)   | 3.59 (0.91,6.26)    | -1.97 (-3.22,-0.71) | -0.26 (-1.17,0.64)      |
| Hot summer continental  | 2.81 (2.40,3.21)  | 0.27 (-0.37,0.91)   | -0.57 (-2.33,1.19)  | 0.36 (-0.69,1.41)   | 0.02 (-0.60,0.65)       |
| Humid subtropical       | 2.76 (2.61,2.91)  | -0.67 (-1.04,-0.30) | -0.12 (-0.57,0.33)  | -0.12 (-0.59,0.34)  | 0.25 (-0.02,0.51)       |
| Mediterranean           | 2.61 (1.79,3.43)  | -0.59 (-1.67,0.49)  | -2.48 (-6.90,1.94)  | 1.81 (-0.05,3.67)   | 0.60 (-0.53,1.72)       |
| Warm summer continental | 2.56 (2.16,2.96)  | 0.48 (-0.10,1.07)   | -1.61 (-2.71,-0.50) | 1.88 (0.72,3.04)    | 0.40 (-0.22,1.02)       |

**Table S7. Percent difference (95%CI) in stroke mortality rates 2000-2005 per 1 standard deviations increase in EQI domain indices estimated from the models clustered by RUCC and climate regions separately.**

| <b>RUCC</b>             | <b>Air</b>          | <b>Water</b>           | <b>Land</b>         | <b>Built</b>       | <b>Sociodemographic</b> |
|-------------------------|---------------------|------------------------|---------------------|--------------------|-------------------------|
| RUCC1                   | 0.36 (-0.81,1.54)   | 0.64 (0.49,0.79)       | 0.45 (-0.03,0.93)   | 0.43 (-0.10,0.96)  | 1.83 (0.52,3.14)        |
| RUCC2                   | -0.03 (-2.27,2.21)  | 0.70 (0.41,0.99)       | -0.68 (-1.79,0.43)  | 0.91 (-0.26,2.07)  | 4.40 (1.80,7.00)        |
| RUCC3                   | 2.27 (0.56,3.98)    | 0.41 (0.20,0.63)       | -1.87 (-2.60,-1.14) | 2.54 (1.63,3.45)   | 5.37 (3.76,6.98)        |
| RUCC4                   | -4.49 (-6.22,-2.77) | 1.28 (1.06,1.50)       | -1.39 (-2.36,-0.42) | -0.55 (-1.46,0.36) | 8.73 (6.47,10.99)       |
| <b>Climate</b>          | <b>Air</b>          | <b>Water</b>           | <b>Land</b>         | <b>Built</b>       | <b>Sociodemographic</b> |
| Dry                     | -0.12 (-4.55,4.32)  | -18.58 (-23.06,-14.09) | 6.82 (1.00,12.63)   | 1.32 (-1.45,4.08)  | 11.25 (8.79,13.70)      |
| Dry continental         | 1.74 (-1.25,4.74)   | -3.31 (-7.52,0.90)     | 4.48 (0.79,8.18)    | -0.55 (-2.72,1.61) | 3.00 (0.28,5.72)        |
| Hot summer continental  | 0.51 (-1.17,2.19)   | 0.06 (-2.08,2.20)      | 1.95 (-0.06,3.96)   | -1.53 (-3.40,0.34) | 1.48 (-0.23,3.18)       |
| Humid subtropical       | -1.71 (-2.59,-0.83) | 1.73 (0.77,2.70)       | -0.87 (-1.92,0.18)  | 1.72 (0.85,2.60)   | 3.55 (2.80,4.31)        |
| Mediterranean           | 2.97 (0.58,5.36)    | -1.89 (-4.86,1.09)     | 5.73 (2.75,8.72)    | 1.51 (-0.93,3.96)  | 3.14 (0.95,5.33)        |
| Warm summer continental | -4.80 (-6.72,-2.88) | 0.19 (-1.67,2.06)      | -4.29 (-6.39,-2.19) | -0.12 (-1.67,1.42) | 4.30 (2.56,6.05)        |

**Table S8. Percent difference (and 95%CI) in all-cause and cause-specific mortality rates  
 2000-2005 per 1 standard deviations increase in the overall EQI estimated from the model  
 clustered by RUCC-climate combination.**

| <b>Climates</b>         | <b>RUCC</b> | <b>All-cause</b>   | <b>Heart disease</b> | <b>Cancer</b>      | <b>Stroke</b>      |
|-------------------------|-------------|--------------------|----------------------|--------------------|--------------------|
| Dry                     | RUCC1       | 9.12 (4.52,13.72)  | 7.18 (1.48,12.87)    | 7.80 (3.19,12.40)  | 11.41 (4.12,18.70) |
|                         | RUCC2       | 6.07 (1.91,10.23)  | 5.38 (0.15,10.60)    | 6.25 (1.97,10.52)  | 14.05 (7.60,20.50) |
|                         | RUCC3       | 4.23 (1.23,7.22)   | 3.24 (-0.88,7.37)    | 5.04 (1.71,8.37)   | 12.17 (7.03,17.31) |
|                         | RUCC4       | 5.66 (2.98,8.33)   | -0.70 (-4.95,3.56)   | 6.72 (3.18,10.26)  | 1.45 (-7.05,9.95)  |
| Dry continental         | RUCC1       | 5.14 (1.44,8.84)   | 1.99 (-3.11,7.09)    | 6.32 (2.42,10.22)  | 3.25 (-3.72,10.22) |
|                         | RUCC2       | 1.14 (-4.59,6.86)  | 0.00 (-6.94,6.95)    | 2.27 (-3.25,7.78)  | 2.83 (-5.70,11.35) |
|                         | RUCC3       | -1.81 (-4.52,0.91) | 0.57 (-3.26,4.40)    | 0.42 (-2.56,3.41)  | 3.95 (-1.19,9.09)  |
|                         | RUCC4       | 3.85 (1.84,5.85)   | 0.78 (-2.46,4.01)    | 2.22 (-0.35,4.80)  | 3.43 (-2.32,9.19)  |
| Hot summer continental  | RUCC1       | 2.43 (-0.10,4.95)  | -0.30 (-4.10,3.50)   | 1.24 (-1.55,4.03)  | 2.05 (-3.06,7.16)  |
|                         | RUCC2       | -1.44 (-6.56,3.69) | -2.73 (-9.16,3.70)   | -0.64 (-5.74,4.46) | 3.15 (-4.77,11.06) |
|                         | RUCC3       | -0.09 (-2.45,2.26) | -0.84 (-4.28,2.59)   | 1.78 (-0.81,4.38)  | 1.61 (-2.87,6.08)  |
|                         | RUCC4       | 5.62 (4.04,7.19)   | 1.84 (-0.95,4.63)    | 5.16 (2.98,7.34)   | -0.97 (-5.59,3.66) |
| Humid subtropical       | RUCC1       | 1.96 (1.11,2.80)   | 0.01 (-1.33,1.34)    | 1.64 (0.68,2.59)   | 0.67 (-1.23,2.57)  |
|                         | RUCC2       | 0.68 (-1.52,2.88)  | -2.32 (-5.54,0.90)   | 2.21 (-0.25,4.66)  | 5.87 (1.76,9.98)   |
|                         | RUCC3       | 0.53 (-0.59,1.64)  | -2.50 (-4.24,-0.75)  | 1.86 (0.58,3.14)   | 5.21 (2.85,7.58)   |
|                         | RUCC4       | 0.91 (-0.29,2.11)  | -4.04 (-6.02,-2.07)  | -0.88 (-2.39,0.64) | 3.03 (0.24,5.81)   |
| Mediterranean           | RUCC1       | 1.30 (-1.67,4.26)  | -1.83 (-6.28,2.62)   | 3.35 (0.08,6.61)   | 4.44 (-1.48,10.37) |
|                         | RUCC2       | 1.23 (-4.05,6.50)  | -1.14 (-7.40,5.13)   | 0.63 (-4.49,5.75)  | -0.05 (-7.72,7.62) |
|                         | RUCC3       | 3.59 (-0.41,7.59)  | 1.37 (-3.70,6.44)    | 2.70 (-1.46,6.85)  | 3.66 (-2.57,9.90)  |
|                         | RUCC4       | 3.27 (-0.53,7.06)  | 4.78 (-0.09,9.65)    | 1.74 (-2.28,5.76)  | 2.36 (-4.28,8.99)  |
| Warm summer continental | RUCC1       | 0.94 (-1.45,3.33)  | -3.01 (-6.69,0.67)   | 3.99 (1.32,6.67)   | -0.13 (-5.18,4.92) |
|                         | RUCC2       | -0.65 (-4.53,3.24) | -7.14 (-12.38,-1.89) | 2.65 (-1.40,6.70)  | 3.48 (-3.20,10.16) |
|                         | RUCC3       | -1.62 (-4.44,1.20) | -6.03 (-10.01,-2.06) | -1.49 (-4.55,1.57) | 1.88 (-3.21,6.98)  |
|                         | RUCC4       | 6.05 (4.20,7.90)   | 0.63 (-2.27,3.53)    | 5.37 (3.17,7.57)   | 0.63 (-3.92,5.18)  |



**Table S9. Percent difference (and 95%CI) in all-cause and cause-specific mortality rates 2000-2005 per 1 standard deviations increase in EQI domain indices estimated from the model clustered by RUCC-climate combination.**

| <b>Air</b>              |       | <b>All-cause</b>    | <b>Heart</b>         | <b>Cancer</b>       | <b>Stroke</b>        |
|-------------------------|-------|---------------------|----------------------|---------------------|----------------------|
| Dry                     | RUCC1 | 1.74 (-0.37,3.85)   | -5.64 (-12.35,1.07)  | 0.71 (-1.39,2.80)   | -3.31 (-9.85,3.22)   |
|                         | RUCC2 | 3.15 (0.82,5.48)    | -2.82 (-9.38,3.73)   | 1.78 (-0.53,4.10)   | -2.76 (-10.14,4.62)  |
|                         | RUCC3 | 3.39 (1.34,5.44)    | -5.97 (-11.26,-0.68) | 0.00 (-2.26,2.26)   | -0.98 (-7.03,5.07)   |
|                         | RUCC4 | 4.18 (2.11,6.25)    | -8.24 (-16.69,0.21)  | 2.09 (-0.48,4.66)   | -1.52 (-9.10,6.05)   |
| Dry continental         | RUCC1 | 3.38 (1.42,5.34)    | 1.62 (-3.43,6.67)    | 1.58 (-0.41,3.57)   | 1.80 (-3.25,6.86)    |
|                         | RUCC2 | 4.85 (2.59,7.10)    | 6.17 (-0.51,12.85)   | 2.80 (0.45,5.14)    | 1.70 (-4.98,8.38)    |
|                         | RUCC3 | 3.84 (2.34,5.34)    | 6.51 (3.10,9.92)     | 2.88 (0.96,4.80)    | 4.14 (-0.92,9.20)    |
|                         | RUCC4 | 4.85 (3.57,6.12)    | 4.03 (0.38,7.67)     | 1.75 (-0.27,3.76)   | -3.38 (-8.86,2.09)   |
| Hot summer continental  | RUCC1 | 3.78 (2.36,5.20)    | 4.71 (1.40,8.03)     | 2.41 (1.15,3.67)    | 1.76 (-1.53,5.06)    |
|                         | RUCC2 | 3.73 (1.83,5.62)    | 6.23 (0.95,11.51)    | 2.55 (0.98,4.13)    | 0.99 (-3.47,5.45)    |
|                         | RUCC3 | 2.73 (1.30,4.15)    | 5.67 (2.89,8.46)     | 2.22 (0.82,3.61)    | 1.90 (-2.03,5.83)    |
|                         | RUCC4 | 4.69 (3.65,5.74)    | 1.88 (-1.11,4.87)    | 3.46 (1.77,5.16)    | -4.17 (-8.11,-0.24)  |
| Humid subtropical       | RUCC1 | 3.98 (3.17,4.79)    | 3.03 (1.22,4.85)     | 3.90 (3.27,4.52)    | -0.47 (-2.02,1.09)   |
|                         | RUCC2 | 2.87 (1.25,4.48)    | 4.39 (0.92,7.86)     | 3.09 (1.67,4.51)    | 0.06 (-3.14,3.25)    |
|                         | RUCC3 | 1.72 (0.68,2.77)    | 2.57 (0.84,4.31)     | 3.82 (2.87,4.77)    | -0.27 (-2.66,2.12)   |
|                         | RUCC4 | 2.23 (1.30,3.16)    | 2.22 (0.54,3.89)     | 1.03 (-0.16,2.23)   | -6.76 (-10.04,-3.48) |
| Mediterranean           | RUCC1 | 3.11 (1.42,4.81)    | 2.73 (-1.48,6.94)    | 2.74 (1.16,4.32)    | 3.81 (0.27,7.36)     |
|                         | RUCC2 | 3.67 (1.53,5.81)    | -2.15 (-9.69,5.40)   | 3.34 (1.20,5.47)    | 6.08 (0.45,11.71)    |
|                         | RUCC3 | 3.67 (1.76,5.58)    | -1.43 (-7.50,4.65)   | 2.37 (0.09,4.66)    | 1.10 (-5.03,7.23)    |
|                         | RUCC4 | 4.06 (2.03,6.08)    | 8.52 (-1.12,18.16)   | 2.76 (0.19,5.33)    | -0.63 (-8.39,7.13)   |
| Warm summer continental | RUCC1 | 3.37 (1.96,4.79)    | 7.96 (4.86,11.05)    | 2.30 (1.33,3.26)    | -4.63 (-7.10,-2.17)  |
|                         | RUCC2 | 3.98 (1.94,6.02)    | 13.44 (8.19,18.69)   | 1.81 (0.37,3.24)    | -3.69 (-8.04,0.66)   |
|                         | RUCC3 | 3.99 (2.23,5.74)    | 13.12 (9.27,16.98)   | 2.36 (0.84,3.87)    | -0.03 (-4.59,4.54)   |
|                         | RUCC4 | 4.60 (3.45,5.76)    | 5.45 (2.12,8.78)     | 4.08 (2.42,5.74)    | -1.12 (-6.00,3.76)   |
| <b>Water</b>            |       | <b>All-cause</b>    | <b>Heart</b>         | <b>Cancer</b>       | <b>Stroke</b>        |
| Dry                     | RUCC1 | -3.09 (-4.76,-1.41) | 1.56 (-0.29,3.42)    | -1.39 (-2.46,-0.32) | -6.38 (-10.73,-2.03) |
|                         | RUCC2 | -1.46 (-3.30,0.37)  | 1.21 (-0.38,2.80)    | -0.83 (-1.92,0.25)  | -5.77 (-9.87,-1.67)  |
|                         | RUCC3 | -0.44 (-2.08,1.21)  | 1.68 (0.25,3.10)     | -1.12 (-2.15,-0.08) | -7.53 (-10.95,-4.11) |
|                         | RUCC4 | 0.00 (-1.98,1.98)   | 2.44 (0.09,4.78)     | -0.92 (-2.10,0.26)  | 0.74 (-5.01,6.49)    |
| Dry continental         | RUCC1 | -0.78 (-2.51,0.96)  | 0.29 (-1.52,2.10)    | -1.14 (-2.10,-0.17) | -1.67 (-6.04,2.69)   |
|                         | RUCC2 | 1.76 (-0.29,3.81)   | -0.75 (-2.95,1.46)   | -0.73 (-1.81,0.35)  | -0.05 (-5.61,5.51)   |
|                         | RUCC3 | 0.57 (-0.91,2.05)   | 0.18 (-1.24,1.60)    | -1.09 (-1.85,-0.32) | -1.77 (-4.38,0.84)   |
|                         | RUCC4 | 0.33 (-1.08,1.73)   | -0.35 (-2.01,1.31)   | -0.11 (-1.08,0.86)  | -2.00 (-6.33,2.34)   |
| Hot summer              | RUCC1 | 0.08 (-1.17,1.33)   | -0.75 (-2.02,0.52)   | 0.13 (-0.86,1.12)   | -0.32 (-3.76,3.12)   |

|                   |                         |                     |                      |                     |                      |                     |
|-------------------|-------------------------|---------------------|----------------------|---------------------|----------------------|---------------------|
| continental       | RUCC2                   | 0.36 (-1.36,2.09)   | -1.15 (-2.63,0.33)   | -0.45 (-1.47,0.58)  | -1.39 (-5.73,2.95)   |                     |
|                   | RUCC3                   | 0.69 (-0.40,1.78)   | -1.02 (-2.15,0.11)   | -0.25 (-1.06,0.55)  | 0.29 (-2.17,2.75)    |                     |
|                   | RUCC4                   | 1.03 (-0.18,2.24)   | 0.22 (-0.94,1.39)    | -0.05 (-0.96,0.85)  | 2.21 (-1.09,5.51)    |                     |
| Humid subtropical | RUCC1                   | -0.60 (-1.17,-0.03) | -0.77 (-1.25,-0.29)  | -0.70 (-1.33,-0.07) | 0.95 (-0.54,2.45)    |                     |
|                   | RUCC2                   | -0.22 (-1.23,0.79)  | -1.40 (-2.26,-0.54)  | -0.26 (-1.17,0.66)  | 1.34 (-1.06,3.73)    |                     |
|                   | RUCC3                   | -0.61 (-1.23,0.01)  | -2.12 (-2.69,-1.55)  | -0.50 (-1.12,0.11)  | 1.80 (0.33,3.28)     |                     |
|                   | RUCC4                   | -0.95 (-1.68,-0.23) | -1.96 (-2.66,-1.25)  | -0.46 (-1.21,0.29)  | 1.89 (-0.03,3.81)    |                     |
|                   | Mediterranean           | RUCC1               | -0.09 (-1.20,1.02)   | 0.37 (-1.05,1.80)   | -0.41 (-1.37,0.55)   | -1.57 (-4.84,1.70)  |
|                   |                         | RUCC2               | 0.66 (-1.04,2.36)    | 0.44 (-1.31,2.19)   | 0.12 (-0.95,1.19)    | 0.18 (-4.53,4.89)   |
| RUCC3             |                         | 0.03 (-1.60,1.67)   | 0.71 (-1.02,2.44)    | -0.32 (-1.33,0.69)  | -2.77 (-7.18,1.65)   |                     |
|                   | RUCC4                   | 0.83 (-1.08,2.73)   | 0.28 (-2.03,2.58)    | -0.01 (-1.18,1.17)  | 0.65 (-4.67,5.98)    |                     |
|                   | Warm summer continental | RUCC1               | -0.10 (-1.18,0.98)   | -1.29 (-2.35,-0.23) | 0.06 (-0.77,0.88)    | 1.39 (-0.88,3.66)   |
|                   |                         | RUCC2               | 0.50 (-1.16,2.17)    | -2.12 (-3.43,-0.82) | -0.19 (-1.17,0.79)   | 2.78 (-0.49,6.05)   |
| RUCC3             |                         | -0.40 (-1.63,0.84)  | -2.37 (-3.44,-1.30)  | -0.65 (-1.45,0.15)  | 0.11 (-2.16,2.38)    |                     |
|                   | RUCC4                   | -0.10 (-1.40,1.20)  | -1.17 (-2.24,-0.10)  | -0.10 (-0.97,0.77)  | -0.63 (-3.32,2.05)   |                     |
|                   | <b>Land</b>             |                     | <b>All-cause</b>     | <b>Heart</b>        | <b>Cancer</b>        |                     |
|                   | Dry                     | RUCC1               | -6.16 (-10.20,-2.11) | 8.92 (3.47,14.36)   | 7.73 (3.65,11.82)    | 11.35 (4.00,18.69)  |
| RUCC2             |                         | -0.63 (-5.60,4.34)  | 4.89 (-0.29,10.07)   | 4.29 (0.70,7.89)    | 10.57 (3.86,17.28)   |                     |
| RUCC3             |                         | 5.86 (2.39,9.33)    | 7.20 (2.26,12.14)    | 10.48 (7.11,13.86)  | 13.00 (7.32,18.68)   |                     |
|                   | RUCC4                   | 4.17 (0.17,8.17)    | 8.80 (1.49,16.11)    | 4.94 (-0.60,10.47)  | -1.13 (-11.43,9.17)  |                     |
|                   | Dry continental         | RUCC1               | -0.94 (-4.11,2.23)   | 3.03 (-2.52,8.57)   | 3.89 (-0.40,8.19)    | 2.27 (-5.55,10.09)  |
|                   |                         | RUCC2               | 2.36 (-2.22,6.95)    | 0.18 (-6.23,6.58)   | -0.97 (-6.58,4.65)   | -0.12 (-9.97,9.74)  |
| RUCC3             |                         | 1.62 (-1.41,4.65)   | -0.81 (-5.04,3.42)   | 1.84 (-1.37,5.05)   | 0.50 (-4.85,5.84)    |                     |
|                   | RUCC4                   | 4.00 (1.30,6.69)    | 1.50 (-3.21,6.22)    | 2.79 (-1.73,7.32)   | 4.84 (-2.98,12.66)   |                     |
|                   | Hot summer continental  | RUCC1               | 0.67 (-1.18,2.52)    | -0.60 (-4.38,3.17)  | 0.37 (-2.23,2.98)    | -1.45 (-6.98,4.08)  |
|                   |                         | RUCC2               | -1.18 (-4.33,1.97)   | -0.67 (-5.29,3.95)  | -2.54 (-5.87,0.79)   | 2.90 (-4.78,10.59)  |
| RUCC3             |                         | -1.35 (-2.83,0.13)  | -0.92 (-4.30,2.45)   | -0.86 (-3.09,1.38)  | -1.18 (-5.41,3.05)   |                     |
|                   | RUCC4                   | 0.07 (-1.46,1.59)   | 0.76 (-2.61,4.13)    | 1.69 (-1.28,4.66)   | -5.55 (-10.83,-0.26) |                     |
|                   | Humid subtropical       | RUCC1               | -0.65 (-1.28,-0.02)  | -0.85 (-1.82,0.12)  | 0.09 (-0.48,0.66)    | 0.20 (-1.20,1.60)   |
|                   |                         | RUCC2               | -0.03 (-1.25,1.18)   | 2.05 (0.03,4.08)    | 0.15 (-0.79,1.09)    | 1.44 (-1.41,4.28)   |
| RUCC3             |                         | -1.68 (-2.37,-0.99) | -1.20 (-2.28,-0.12)  | -0.77 (-1.36,-0.18) | -1.78 (-3.31,-0.25)  |                     |
|                   | RUCC4                   | -1.06 (-2.01,-0.11) | -2.58 (-3.78,-1.38)  | 0.03 (-0.91,0.96)   | -1.74 (-3.83,0.35)   |                     |
|                   | Mediterranean           | RUCC1               | -2.20 (-5.16,0.76)   | 4.96 (0.10,9.82)    | 1.12 (-2.75,4.99)    | 2.97 (-3.36,9.31)   |
|                   |                         | RUCC2               | 0.20 (-4.53,4.93)    | 4.43 (-1.60,10.47)  | -3.24 (-8.08,1.59)   | 0.40 (-8.53,9.33)   |
| RUCC3             |                         | -1.09 (-4.61,2.43)  | 4.38 (-1.29,10.04)   | 0.41 (-4.54,5.36)   | 4.54 (-3.89,12.97)   |                     |
|                   | RUCC4                   | -0.98 (-5.18,3.23)  | 1.28 (-5.81,8.36)    | -2.04 (-8.15,4.08)  | -0.83 (-10.44,8.78)  |                     |
|                   | Warm summer continental | RUCC1               | -0.66 (-2.90,1.57)   | -2.38 (-5.53,0.77)  | 0.21 (-1.84,2.26)    | -2.68 (-7.01,1.65)  |
|                   |                         | RUCC2               | -0.51 (-3.81,2.79)   | -4.45 (-8.34,-0.55) | 1.28 (-1.59,4.15)    | -4.83 (-10.97,1.31) |
| RUCC3             |                         | -2.95 (-4.79,-1.11) | -5.33 (-7.94,-2.71)  | -1.30 (-2.90,0.31)  | -1.29 (-4.81,2.23)   |                     |
|                   | RUCC4                   | -3.77 (-5.71,-1.84) | -0.71 (-3.23,1.81)   | -2.11 (-3.98,-0.24) | -1.58 (-5.78,2.63)   |                     |
|                   | <b>Built</b>            |                     | <b>All-cause</b>     | <b>Heart</b>        | <b>Cancer</b>        |                     |
|                   |                         |                     |                      |                     | <b>Stroke</b>        |                     |

|                         |       |                     |                     |                     |                     |
|-------------------------|-------|---------------------|---------------------|---------------------|---------------------|
| Dry                     | RUCC1 | 5.11 (2.46,7.76)    | 1.05 (-2.80,4.90)   | 2.61 (-0.79,6.00)   | 5.05 (0.16,9.93)    |
|                         | RUCC2 | 1.69 (-1.72,5.10)   | -0.83 (-4.86,3.20)  | 1.21 (-2.97,5.39)   | 5.19 (0.20,10.19)   |
|                         | RUCC3 | -2.30 (-4.63,0.02)  | -0.06 (-3.02,2.90)  | -3.16 (-6.14,-0.18) | 5.45 (1.56,9.35)    |
|                         | RUCC4 | -0.97 (-3.57,1.63)  | 0.01 (-3.45,3.47)   | 2.42 (-1.23,6.07)   | 0.16 (-5.66,5.99)   |
| Dry continental         | RUCC1 | 1.30 (-1.13,3.73)   | -1.84 (-5.18,1.51)  | 2.39 (-0.64,5.42)   | 0.86 (-3.50,5.23)   |
|                         | RUCC2 | -1.47 (-4.56,1.62)  | -1.60 (-4.88,1.67)  | -0.78 (-4.26,2.69)  | 1.05 (-4.52,6.63)   |
|                         | RUCC3 | -1.54 (-3.50,0.42)  | -4.46 (-6.58,-2.35) | -3.00 (-5.38,-0.62) | 1.27 (-2.39,4.93)   |
|                         | RUCC4 | -1.46 (-3.13,0.21)  | -1.20 (-3.49,1.08)  | -0.84 (-3.02,1.34)  | 3.20 (-1.12,7.52)   |
| Hot summer continental  | RUCC1 | -0.14 (-1.78,1.51)  | -0.97 (-3.66,1.72)  | -0.68 (-2.83,1.48)  | -0.35 (-3.18,2.47)  |
|                         | RUCC2 | 0.96 (-1.60,3.52)   | -0.82 (-4.25,2.61)  | 1.19 (-2.46,4.83)   | 2.92 (-1.57,7.41)   |
|                         | RUCC3 | 0.96 (-0.35,2.26)   | -0.98 (-3.14,1.17)  | 1.54 (-0.34,3.42)   | 0.63 (-2.29,3.54)   |
|                         | RUCC4 | 1.14 (0.06,2.22)    | -1.60 (-3.49,0.30)  | 0.19 (-1.29,1.67)   | -4.05 (-6.95,-1.14) |
| Humid subtropical       | RUCC1 | 0.60 (-0.08,1.28)   | -0.64 (-1.97,0.68)  | -0.85 (-1.70,0.00)  | 0.13 (-1.06,1.32)   |
|                         | RUCC2 | 0.60 (-0.70,1.91)   | 2.01 (-0.49,4.52)   | 0.88 (-1.73,3.49)   | 3.03 (-0.09,6.14)   |
|                         | RUCC3 | 2.21 (1.47,2.95)    | 1.83 (0.63,3.03)    | 0.97 (-0.13,2.06)   | 3.50 (1.81,5.19)    |
|                         | RUCC4 | 1.44 (0.71,2.16)    | -0.54 (-1.83,0.75)  | -0.11 (-1.08,0.87)  | 0.00 (-1.71,1.72)   |
| Mediterranean           | RUCC1 | 1.80 (-0.33,3.93)   | -0.31 (-3.44,2.83)  | 1.50 (-1.66,4.66)   | 3.88 (0.97,6.80)    |
|                         | RUCC2 | 0.19 (-2.97,3.35)   | 0.15 (-3.70,4.01)   | 1.16 (-2.81,5.12)   | 3.61 (-1.70,8.93)   |
|                         | RUCC3 | 1.25 (-1.08,3.57)   | -0.93 (-3.62,1.76)  | 1.94 (-1.25,5.13)   | 3.25 (-1.71,8.20)   |
|                         | RUCC4 | 0.76 (-2.08,3.60)   | -4.30 (-7.58,-1.01) | 1.01 (-2.54,4.55)   | 0.59 (-4.87,6.06)   |
| Warm summer continental | RUCC1 | 1.00 (-0.69,2.69)   | -2.15 (-4.67,0.37)  | 2.32 (-0.05,4.70)   | -2.44 (-4.89,0.02)  |
|                         | RUCC2 | 0.25 (-2.09,2.60)   | -3.18 (-6.41,0.06)  | 0.94 (-2.27,4.16)   | -2.76 (-6.74,1.23)  |
|                         | RUCC3 | 1.46 (0.08,2.85)    | -3.16 (-5.44,-0.88) | -0.02 (-2.56,2.52)  | 0.73 (-2.47,3.93)   |
|                         | RUCC4 | 3.44 (2.05,4.84)    | -0.54 (-2.41,1.32)  | 3.46 (1.65,5.27)    | -0.28 (-3.60,3.04)  |
| <b>Sociodemographic</b> |       | <b>All-cause</b>    | <b>Heart</b>        | <b>Cancer</b>       | <b>Stroke</b>       |
| Dry                     | RUCC1 | 1.86 (-1.70,5.42)   | 2.54 (-2.13,7.22)   | 4.58 (1.66,7.51)    | 11.70 (6.46,16.93)  |
|                         | RUCC2 | 2.77 (0.12,5.42)    | 2.78 (-1.24,6.79)   | 2.53 (0.34,4.71)    | 11.09 (6.42,15.76)  |
|                         | RUCC3 | 3.84 (1.75,5.92)    | 4.24 (0.90,7.58)    | 4.24 (2.46,6.02)    | 10.11 (5.91,14.31)  |
|                         | RUCC4 | 3.95 (0.36,7.55)    | 6.43 (0.17,12.70)   | 3.76 (0.97,6.55)    | 3.40 (-4.90,11.69)  |
| Dry continental         | RUCC1 | 0.43 (-1.73,2.59)   | -0.96 (-4.25,2.33)  | 2.25 (-0.46,4.96)   | 1.52 (-3.90,6.94)   |
|                         | RUCC2 | -2.61 (-6.28,1.07)  | -4.34 (-9.52,0.84)  | -1.63 (-5.41,2.14)  | 1.43 (-5.35,8.21)   |
|                         | RUCC3 | -3.17 (-5.46,-0.88) | -1.51 (-4.74,1.72)  | -0.22 (-2.15,1.71)  | 0.66 (-4.18,5.50)   |
|                         | RUCC4 | 2.71 (0.05,5.37)    | -2.97 (-6.47,0.54)  | 0.90 (-1.52,3.32)   | 8.52 (1.73,15.30)   |
| Hot summer continental  | RUCC1 | -0.94 (-2.64,0.76)  | -2.89 (-5.21,-0.57) | -0.30 (-2.05,1.44)  | 0.72 (-3.07,4.50)   |
|                         | RUCC2 | -2.30 (-5.26,0.66)  | -4.78 (-8.53,-1.04) | -2.29 (-5.06,0.49)  | 4.14 (-1.23,9.51)   |
|                         | RUCC3 | -4.23 (-5.76,-2.70) | -3.95 (-6.64,-1.25) | -0.94 (-2.50,0.63)  | 0.94 (-2.46,4.35)   |
|                         | RUCC4 | 0.25 (-1.42,1.91)   | 0.35 (-2.26,2.96)   | 2.03 (0.45,3.61)    | 1.99 (-2.36,6.34)   |
| Humid subtropical       | RUCC1 | -0.30 (-0.98,0.38)  | -1.76 (-2.90,-0.62) | 0.32 (-0.27,0.91)   | 1.34 (-0.34,3.02)   |
|                         | RUCC2 | -1.01 (-2.58,0.56)  | -6.21 (-8.50,-3.91) | 0.51 (-0.88,1.89)   | 3.16 (0.41,5.90)    |
|                         | RUCC3 | -0.88 (-1.56,-0.21) | -4.66 (-6.23,-3.10) | 0.31 (-0.49,1.11)   | 5.28 (3.52,7.05)    |
|                         | RUCC4 | -0.42 (-1.20,0.37)  | -3.10 (-4.77,-1.43) | -2.07 (-3.05,-1.08) | 7.68 (5.30,10.06)   |

|                         |       |                     |                      |                     |                    |
|-------------------------|-------|---------------------|----------------------|---------------------|--------------------|
| Mediterranean           | RUCC1 | -2.12 (-3.77,-0.46) | -2.76 (-5.57,0.05)   | 1.13 (-1.08,3.33)   | 2.54 (-1.16,6.23)  |
|                         | RUCC2 | -2.14 (-6.08,1.80)  | 0.72 (-3.95,5.40)    | -1.79 (-5.37,1.79)  | -0.54 (-6.88,5.80) |
|                         | RUCC3 | -0.99 (-4.92,2.93)  | 1.00 (-3.48,5.49)    | 0.39 (-2.76,3.55)   | 4.97 (-1.22,11.15) |
|                         | RUCC4 | -2.80 (-6.77,1.18)  | -3.95 (-10.92,3.01)  | -1.46 (-4.82,1.90)  | 2.92 (-4.72,10.56) |
| Warm summer continental | RUCC1 | -0.90 (-2.07,0.27)  | -5.00 (-6.91,-3.09)  | 0.52 (-0.95,2.00)   | 3.67 (0.42,6.91)   |
|                         | RUCC2 | -2.65 (-5.05,-0.25) | -9.00 (-12.61,-5.39) | 0.30 (-2.20,2.79)   | 2.03 (-3.45,7.52)  |
|                         | RUCC3 | -2.76 (-4.70,-0.81) | -8.82 (-11.94,-5.71) | -2.00 (-3.74,-0.26) | 3.28 (-1.00,7.56)  |
|                         | RUCC4 | 0.41 (-1.56,2.38)   | -4.34 (-7.49,-1.19)  | 0.61 (-0.82,2.04)   | 4.13 (-0.29,8.55)  |
